# Supplementary material for: TM@gt-C3N3monolayers: high-temperature ferromagnetism and high anisotropy
Source: Royal Society of Chemistry journal article supplement (doi:10.1039/c6tc03030k), 2016-01-01
Supplement: c6tc03030k1.pdf [file c6tc03030k1.pdf]

## Supporting Information

### Transition-Metal Embedded gt-C<sub>3</sub>N<sub>3</sub> Monolayers: High-Temperature Ferromagnetism and High Anisotropy

Indrani Choudhuri,<sup>†</sup> Priyanka Garg,<sup>†</sup> Biswarup Pathak,<sup>†,#,\*</sup>

<sup>†</sup>Discipline of Chemistry and <sup>#</sup>Discipline of Metallurgy Engineering and Material Science, Indian Institute of Technology (IIT) Indore, Indore 453552, India

Email: [biswarup@iiti.ac.in](mailto:biswarup@iiti.ac.in)

#### Contents:

**Figure S1:** (a) Optimized structure of gt-C<sub>3</sub>N<sub>3</sub> (top and side views) and (b) charge density of gt-C<sub>3</sub>N<sub>3</sub> (Isosurface value is 0.18 e.Å<sup>-3</sup>).

**Figure S2:** Optimized structures (top and side views) of TM@gt-C<sub>3</sub>N<sub>3</sub> (TM = Sc to Cu) structures.

**Table S1:** Bond lengths and net effective charges calculated from Bader Charge analysis of gt-C<sub>3</sub>N<sub>3</sub> and TM@gt-C<sub>3</sub>N<sub>3</sub> (See Figure 1 in the manuscript for atom numbering)

**Text S1.** Formation Energy (E<sub>f</sub>), Binding Energy (E<sub>B</sub>) and Cohesive Energy (E<sub>coh</sub>) calculations.

**Figure S3:** Total electron density (Isosurface value: 0.18 e.Å<sup>-3</sup>) and electrostatic potentials (ESP) plots (Isosurface value: 0.03 e.Å<sup>-3</sup>) of TM@gt-C<sub>3</sub>N<sub>3</sub> (Sc to Cu). The blue and red colours denote less and more electron dense area in the electrostatic potential surface.

**Table 2:** Binding energy (E<sub>B</sub>/TM), formation energy (E<sub>F</sub>), cohesive energy of TM bulk (E<sub>Coh</sub>/atom) and phonon frequency of TM@gt-C<sub>3</sub>N<sub>3</sub> systems. (TM = Sc to Cu)

**Figure S4:** Phonon band structures of TM@gt-C<sub>3</sub>N<sub>3</sub> (TM = Sc to Cu)

**Figure S5:** Total energy fluctuation during AIMD simulations of Cr@gt-C<sub>3</sub>N<sub>3</sub>, Mn@gt-C<sub>3</sub>N<sub>3</sub> and Fe@gt-C<sub>3</sub>N<sub>3</sub> systems at 400 and 500 K. The structures represent the snapshot at 10 ps for each simulation.

**Figure S6:** Strain energy of (a) Cr@gt-C<sub>3</sub>N<sub>3</sub> (b) Mn@gt-C<sub>3</sub>N<sub>3</sub> and (c) Fe@gt-C<sub>3</sub>N<sub>3</sub> under in-plane uniaxial and equi-biaxial strains.

**Table S3:** Calculated Young's Modulus and Poisson's ratio of TM@gt-C<sub>3</sub>N<sub>3</sub> by applying uniaxial and equi-biaxial strain.

**Figure S7.** Energy diagram of d-orbital splitting of different TM@C<sub>3</sub>N<sub>3</sub> systems.

**Figure S8:** (a) TDOS and pDOS plot of (a) Cr@gt-C<sub>3</sub>N<sub>3</sub>, (b) Mn@gt-C<sub>3</sub>N<sub>3</sub> and (c) Fe@gt-C<sub>3</sub>N<sub>3</sub> (Fermi level is shifted to zero and indicated by black dashed line)

**Table S4:** Exchange energy ( $E_{ex}$ ) and Curie temperature value of TM@gt-C<sub>3</sub>N<sub>3</sub> system.

**Figure S9.** Band structures of Mn@gt-C<sub>3</sub>N<sub>3</sub> by applying 1%, 5% and 10% (a) uniaxial and (b) biaxial tensile strain. The Fermi level is set to zero and indicated by blue dashed line.

**Figure S10.** Band structures of Fe@gt-C<sub>3</sub>N<sub>3</sub> by applying 1%, 5% and 10% (a) uniaxial and (b) biaxial tensile strain. The Fermi level is set to zero and indicated by blue dashed line

**Text S2. Calculation of Magnetic Anisotropy Energy (MAE)**

**Text S3.** Mean Field Theory (MFT) and Monte Carlo Simulation.

**References**

===== :

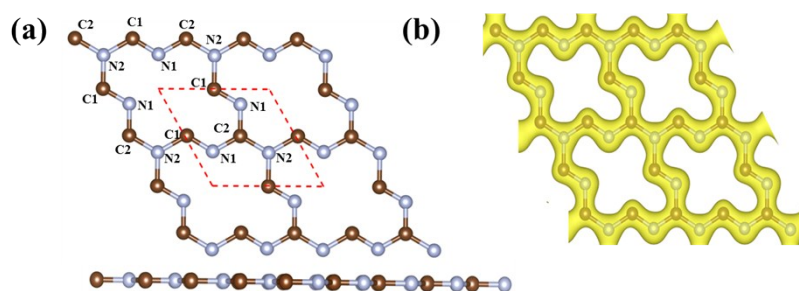

**Figure S1:** (a) Optimized structure of  $\text{gt-C}_3\text{N}_3$  (top and side views) and (b) charge density of  $\text{gt-C}_3\text{N}_3$  (Isosurface value is  $0.18 \text{ e}\cdot\text{\AA}^{-3}$ ).

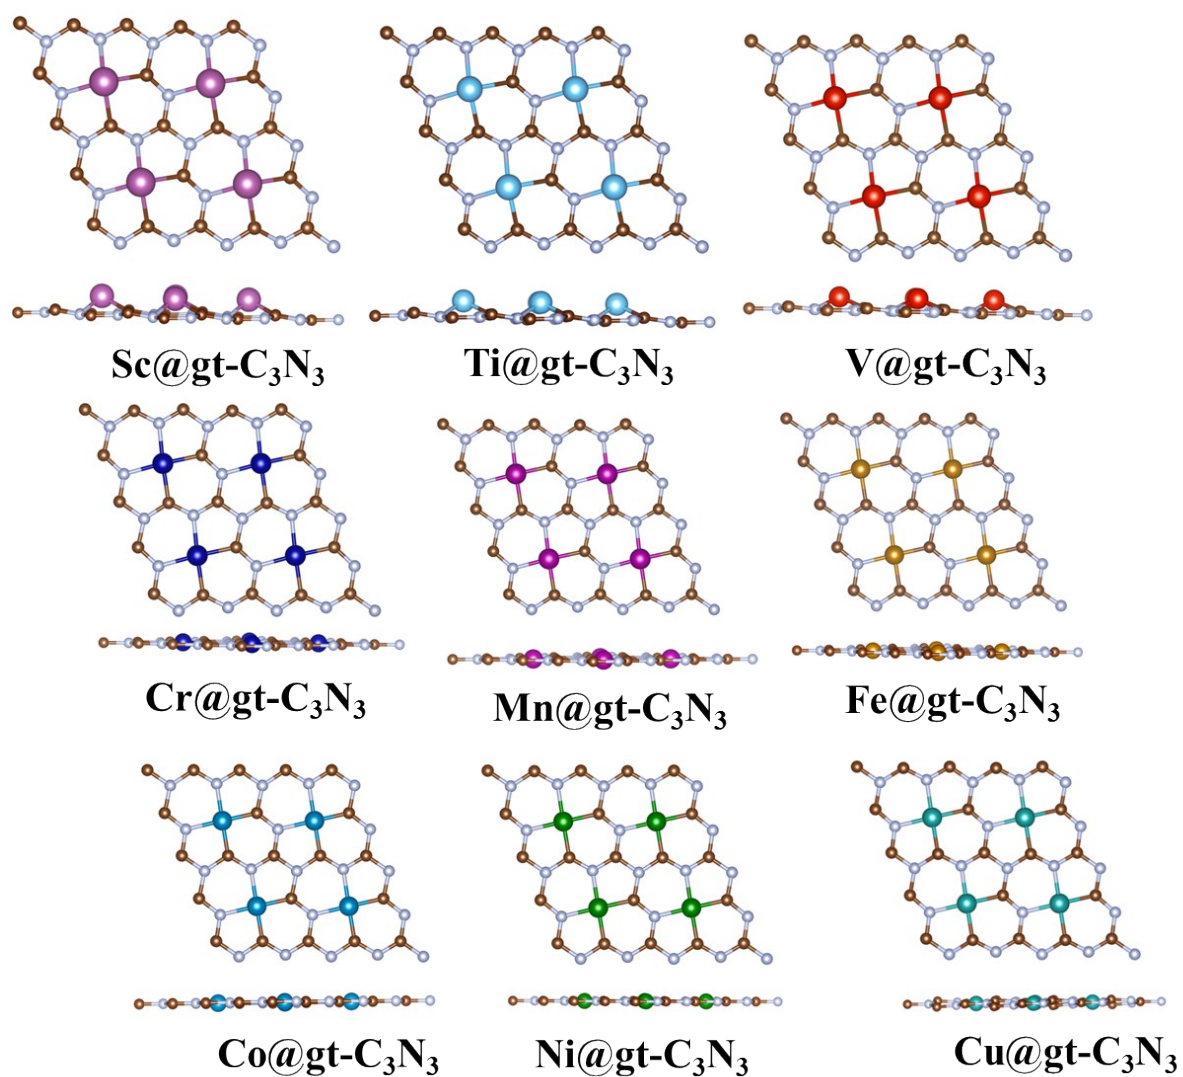

**Figure S2:** Optimized structures (top and side views) of TM@gt-C<sub>3</sub>N<sub>3</sub> (TM = Sc to Cu) structures.

**Table S1:** Bond lengths and net effective charges calculated from Bader Charge analysis of gt-C<sub>3</sub>N<sub>3</sub> and TM@gt-C<sub>3</sub>N<sub>3</sub> (See Figure 1 in the manuscript for atom numbering)

| Compound                            | Bond length (Å)          |                                                              | Net Effective Charge    |                        |            |
|-------------------------------------|--------------------------|--------------------------------------------------------------|-------------------------|------------------------|------------|
|                                     |                          |                                                              | C                       | N                      | TM         |
| gt-C <sub>3</sub> N <sub>3</sub>    |                          | C2-N1 = 1.33<br>C2-N2 = 1.39<br>C1-N1 = 1.27<br>C1-N2 = 1.41 | C1= +0.98<br>C2= +1.57  | N1=-1.26<br>N2=-1.01   |            |
| Sc@gt-C <sub>3</sub> N <sub>3</sub> | Sc-N= 2.12<br>Sc-C= 2.15 | C2-N2 = 1.44<br>C2-N1 = 1.35<br>C1-N1 = 1.36<br>C1-N2 = 1.43 | C1= +0.55<br>C2 = +1.36 | N1= -1.31<br>N2= -1.12 | Sc = +1.44 |
| Ti@gt-C <sub>3</sub> N <sub>3</sub> | Ti-N= 2.05<br>Ti-C= 2.06 | C2-N2 = 1.42<br>C2-N1 = 1.35<br>C1-N1 = 1.36<br>C1-N2 = 1.41 | C1= +0.48<br>C2 = +1.39 | N1= -1.30<br>N2= -1.11 | Ti = +1.33 |
| V@gt-C <sub>3</sub> N <sub>3</sub>  | V-N= 2.01<br>V-C= 1.99   | C2-N2 = 1.43<br>C2-N1 = 1.35<br>C1-N1 = 1.36<br>C1-N2 = 1.42 | C1= +0.53<br>C2 = +1.39 | N1= -1.29<br>N2= -1.11 | V = +1.24  |
| Cr@gt-C <sub>3</sub> N <sub>3</sub> | Cr-N= 1.97<br>Cr-C= 1.94 | C2-N2 = 1.44<br>C2-N1 = 1.35<br>C1-N1 = 1.34<br>C1-N2 = 1.42 | C1= +0.06<br>C2 = +1.97 | N1= -1.32<br>N2= -1.07 | Cr = +1.62 |
| Mn@gt-C <sub>3</sub> N <sub>3</sub> | Mn-N= 1.94<br>Mn-C= 1.90 | C2-N2 = 1.43<br>C2-N1 = 1.36<br>C1-N1 = 1.35<br>C1-N2 = 1.42 | C1= +0.06<br>C2= +1.99  | N1= -1.32<br>N2= -1.15 | Mn = +1.68 |
| Fe@gt-C <sub>3</sub> N <sub>3</sub> | Fe-N= 1.92<br>Fe-C= 1.84 | C2-N2 = 1.41<br>C2-N1 = 1.36<br>C1-N1 = 1.36<br>C1-N2 = 1.42 | C1= +0.07<br>C2= +2.00  | N1= -1.27<br>N2= -1.17 | Fe = +1.57 |
| Co@gt-C <sub>3</sub> N <sub>3</sub> | Co-N= 1.90<br>Co-C= 1.79 | C2-N2 = 1.39<br>C2-N1 = 1.35<br>C1-N1 = 1.35<br>C1-N2 = 1.42 | C1= +0.72<br>C2= +1.50  | N1= -1.23<br>N2= -1.19 | Co = +0.66 |
| Ni@gt-C <sub>3</sub> N <sub>3</sub> | Ni-N= 1.89<br>Ni-C= 1.83 | C2-N2 = 1.39<br>C2-N1 = 1.35<br>C1-N1 = 1.34<br>C1-N2 = 1.40 | C1= +0.79<br>C2= +1.51  | N1= -1.25<br>N2= -1.21 | Ni = +0.62 |
| Cu@gt-C <sub>3</sub> N <sub>3</sub> | Cr-N= 1.93<br>Cr-C= 1.89 | C2-N2 = 1.41<br>C2-N1 = 1.35                                 | C1= +0.78<br>C2= +1.46  | N1= -1.27<br>N2= -1.20 | Cu= +0.72  |

---


$$\begin{aligned} \text{C1-N1} &= 1.33 \\ \text{C1-N2} &= 1.40 \end{aligned}$$


---

**Text S1. Formation Energy ( $E_f$ ), Binding Energy ( $E_B$ ) and Cohesive Energy ( $E_{\text{coh}}$ ) Calculations:**

The N-vacancy formation energy is calculated for g-C<sub>3</sub>N<sub>3</sub> system with the help of the following equation.

$$E_{\text{N-vacancy}} = [E_{\text{gt-C3N4}} - (E_{\text{gt-C3N3}} + \mu_{\text{N}})] \quad (1)$$

Here,  $E_{\text{TM@g-C3N4}}$  is the total energy of TM@g-C<sub>3</sub>N<sub>4</sub>,  $E_{\text{g-C3N3}}$  is the total energy of gt-C<sub>3</sub>N<sub>3</sub> sheet, and  $\mu_{\text{N}}$  represents the chemical potential of nitrogen (N).  $\mu_{\text{N}}$  is calculated from the total energy of an isolated N<sub>2</sub> molecule.

The formation energy ( $E_f$ ) is calculated for each TM embedding in the pore of gt-C<sub>3</sub>N<sub>3</sub> (Figure 1) using the following equation:

$$E_f = [E_{\text{TM@g-C3N3}} - (E_{\text{gt-C3N3}} + \mu_{\text{TM}})] \quad (2)$$

where  $E_{\text{TM@g-C3N3}}$  is the total energy of TM@g-C<sub>3</sub>N<sub>3</sub>,  $E_{\text{g-C3N3}}$  is the total energy of gt-C<sub>3</sub>N<sub>3</sub> sheet, and  $\mu_{\text{TM}}$  represents the chemical potential of TM in their respective bulk structure. The chemical potentials of Cr ( $\mu_{\text{Cr}}$ ), Mn ( $\mu_{\text{Mn}}$ ), and Fe ( $\mu_{\text{Fe}}$ ) are calculated from their most stable crystals such as Cr in bcc,<sup>1</sup> Mn in cubic,<sup>2</sup> and Fe in bcc,<sup>3</sup> respectively.

We have also calculated the binding energy ( $E_B$ ) of TM in the pore of g-C<sub>3</sub>N<sub>3</sub> using the following equation:

$$E_B = E_{\text{gt-C3N3+TM}} - (E_{\text{gt-C3N3}} + E_{\text{TM}}) \quad (3)$$

where,  $E_{\text{TM}}$  represents the total energy of the isolated atom.

The cohesive energy of a solid is the energy required to dissociate the solid into their isolated atomic species. It is calculated by using the following equation:

$$E_{\text{coh}} = E_{\text{Solid}} - \sum_A E_A^{\text{isolated}} \quad (4)$$

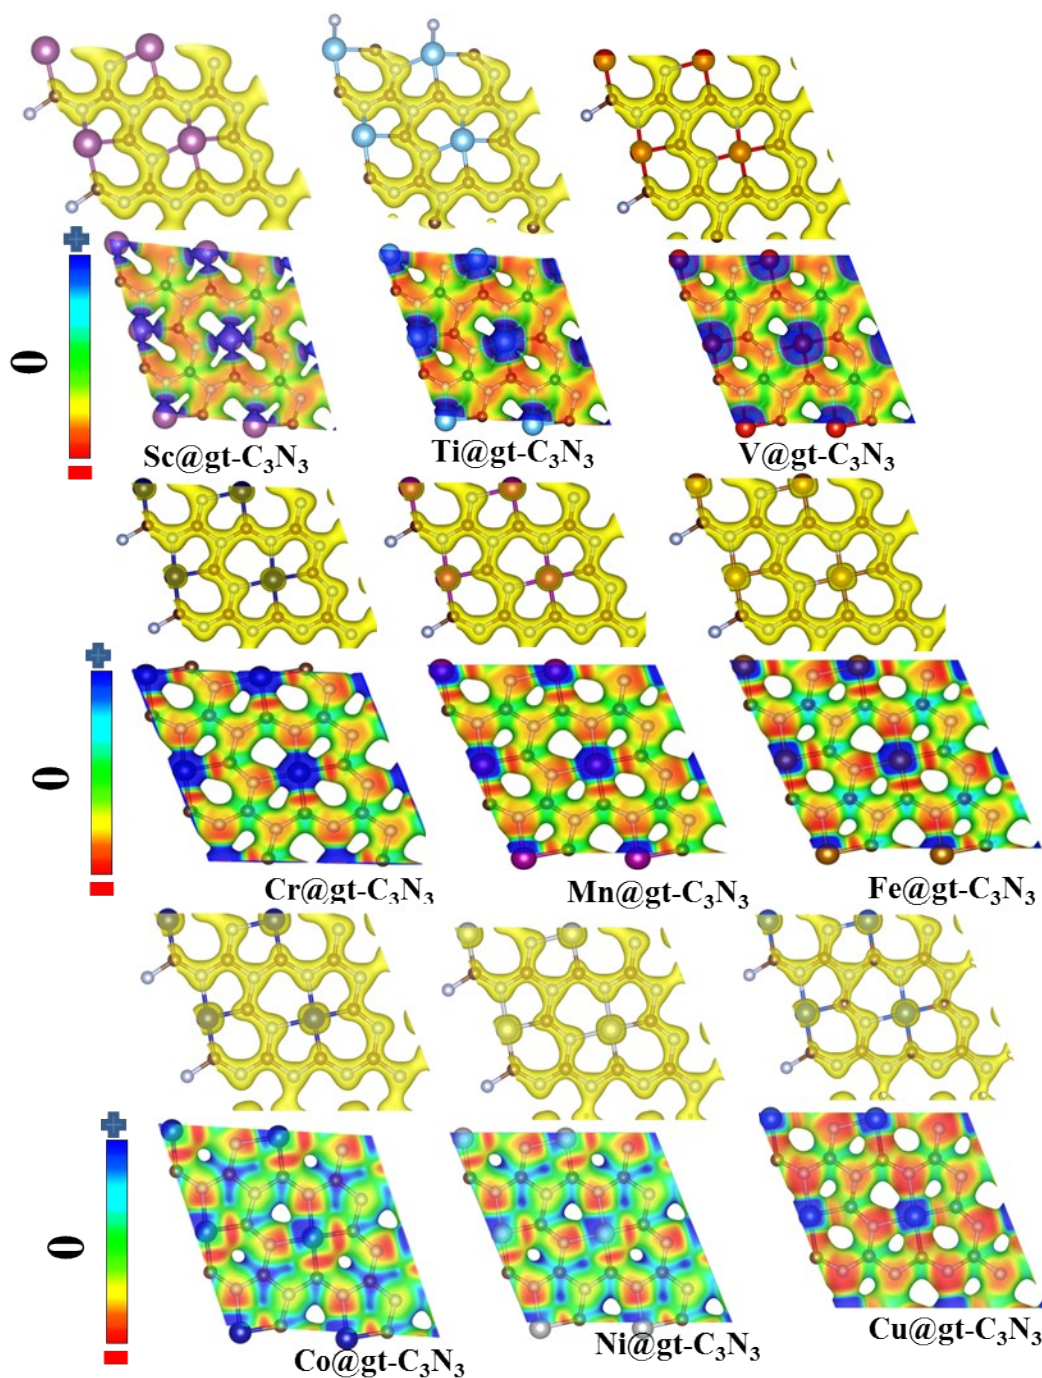

**Figure S3:** Total electron density (Isosurface value:  $0.18 \text{ e.}\text{\AA}^{-3}$ ) and electrostatic potentials (ESP) plots (Isosurface value:  $0.03 \text{ e.}\text{\AA}^{-3}$ ) of TM@gt- $\text{C}_3\text{N}_3$  (Sc to Cu). The blue and red colours denote less and more electron dense area in the electrostatic potential surface.

**Table S2:** Binding energy ( $E_B$ /TM), formation energy ( $E_F$ ), cohesive energy of TM bulk ( $E_{Coh}/atom$ ) and phonon frequency of TM@gt- $C_3N_3$  systems. (TM = Sc to Cu)

| Systems<br>(TM@gt- $C_3N_3$ ) | $E_B$ /TM<br>(eV) | $E_F$ (eV) | $E_{Coh}$ (eV) | Imaginary<br>Frequency ( $i$ ) |           |
|-------------------------------|-------------------|------------|----------------|--------------------------------|-----------|
|                               |                   |            |                | THz                            | $cm^{-1}$ |
| <b>Sc</b>                     | -3.81             | 3.22       | -4.11          | 1.61                           | 53.76     |
| <b>Ti</b>                     | -3.72             | 4.08       | -5.02          | 1.73                           | 57.80     |
| <b>V</b>                      | -5.95             | 2.60       | -5.56          | 0.79                           | 26.31     |
| <b>Cr</b>                     | -9.50             | -1.81      | -4.27          | 0.005                          | 0.16      |
| <b>Mn</b>                     | -8.26             | -1.32      | -3.12          | 0.012                          | 0.42      |
| <b>Fe</b>                     | -8.10             | -1.17      | -4.46          | 0.013                          | 0.45      |
| <b>Co</b>                     | -6.81             | 0.94       | -4.62          | 1.36                           | 45.45     |
| <b>Ni</b>                     | -5.22             | 1.07       | -4.67          | 0.96                           | 32.07     |
| <b>Cu</b>                     | -3.73             | 1.04       | -3.75          | 0.50                           | 16.69     |



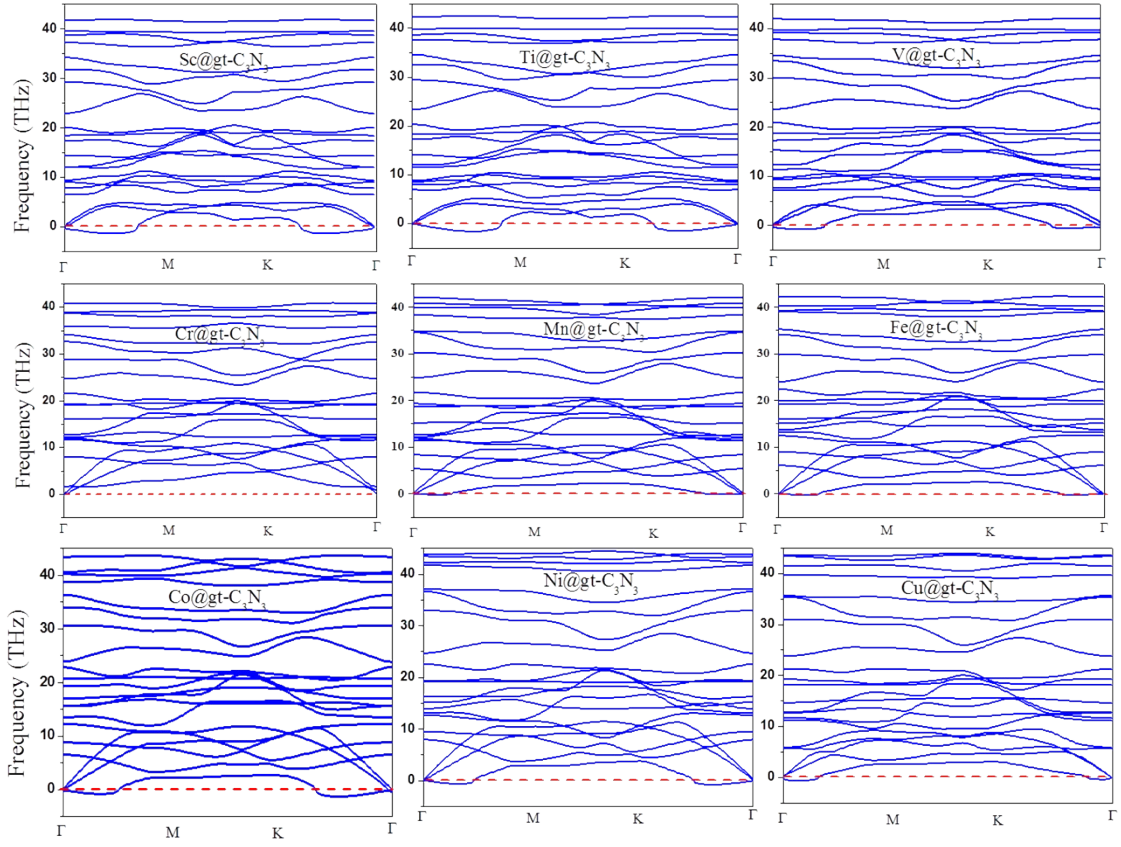

**Figure S4:** Phonon band structures of TM@gt-C<sub>3</sub>N<sub>3</sub> (TM = Sc to Cu)

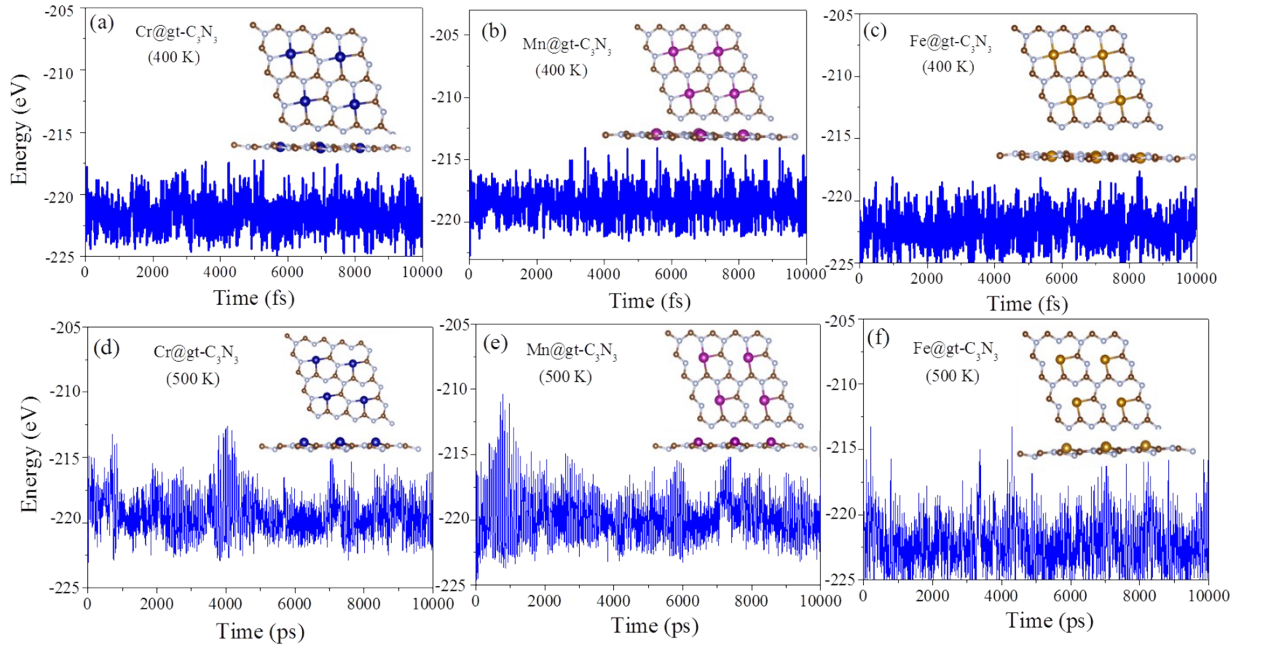



**Figure S5:** Total energy fluctuation during AIMD simulations of Cr@gt-C<sub>3</sub>N<sub>3</sub>, Mn@gt-C<sub>3</sub>N<sub>3</sub> and Fe@gt-C<sub>3</sub>N<sub>3</sub> systems at 400 and 500 K. The structures represent the snapshot at 10 ps for each simulation.

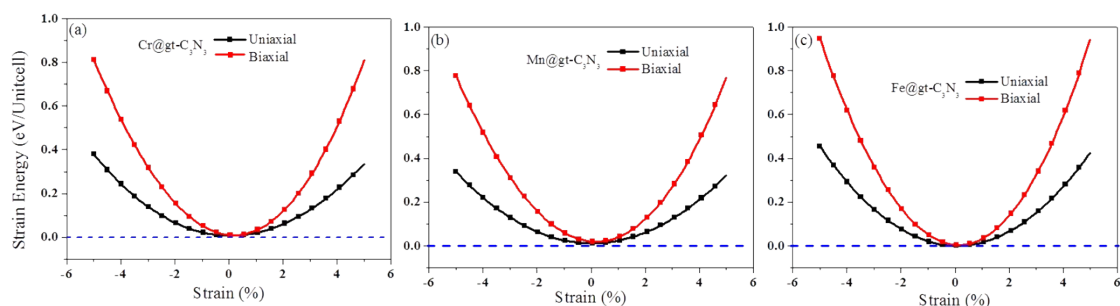

**Figure S6:** Strain energy of (a) Cr@gt-C<sub>3</sub>N<sub>3</sub> (b) Mn@gt-C<sub>3</sub>N<sub>3</sub> and (c) Fe@gt-C<sub>3</sub>N<sub>3</sub> under in-plane uniaxial and equi-biaxial strains.

**Table S3:** Calculated Young's Modulus and Poisson's ratio of TM@gt-C<sub>3</sub>N<sub>3</sub> by applying uniaxial and equi-biaxial strain.

| Compound                            | Young's Modulus<br>(GPa) | Poisson's Ratio | Elastic constants<br>(GPa)                                                    |
|-------------------------------------|--------------------------|-----------------|-------------------------------------------------------------------------------|
| Cr@gt-C <sub>3</sub> N <sub>3</sub> | 124.97                   | 0.49            | C <sub>11</sub> =166.32<br>C <sub>12</sub> = 82.92<br>C <sub>44</sub> = 41.70 |
| Mn@gt-C <sub>3</sub> N <sub>3</sub> | 113.26                   | 0.50            | C <sub>11</sub> =153.12<br>C <sub>12</sub> = 78.12<br>C <sub>44</sub> = 37.50 |
| Fe@gt-C <sub>3</sub> N <sub>3</sub> | 114.98                   | 0.49            | C <sub>11</sub> =153.01<br>C <sub>12</sub> = 76.28<br>C <sub>44</sub> = 38.20 |

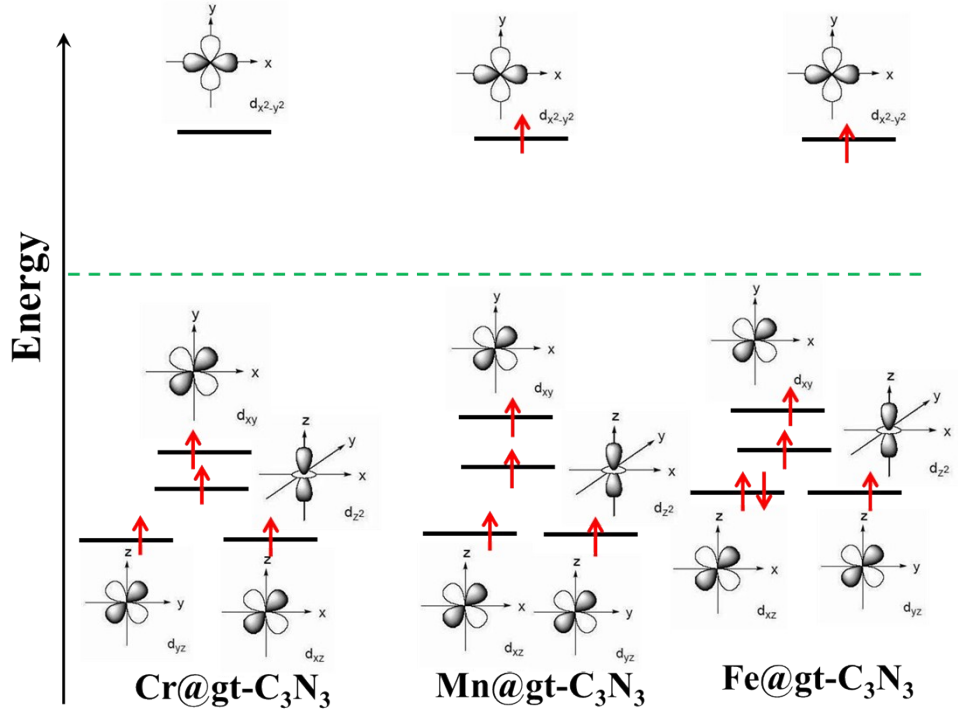

Figure S7. d-orbital splitting energy diagram for Cr, Mn and Fe@gt-C<sub>3</sub>N<sub>3</sub> systems.

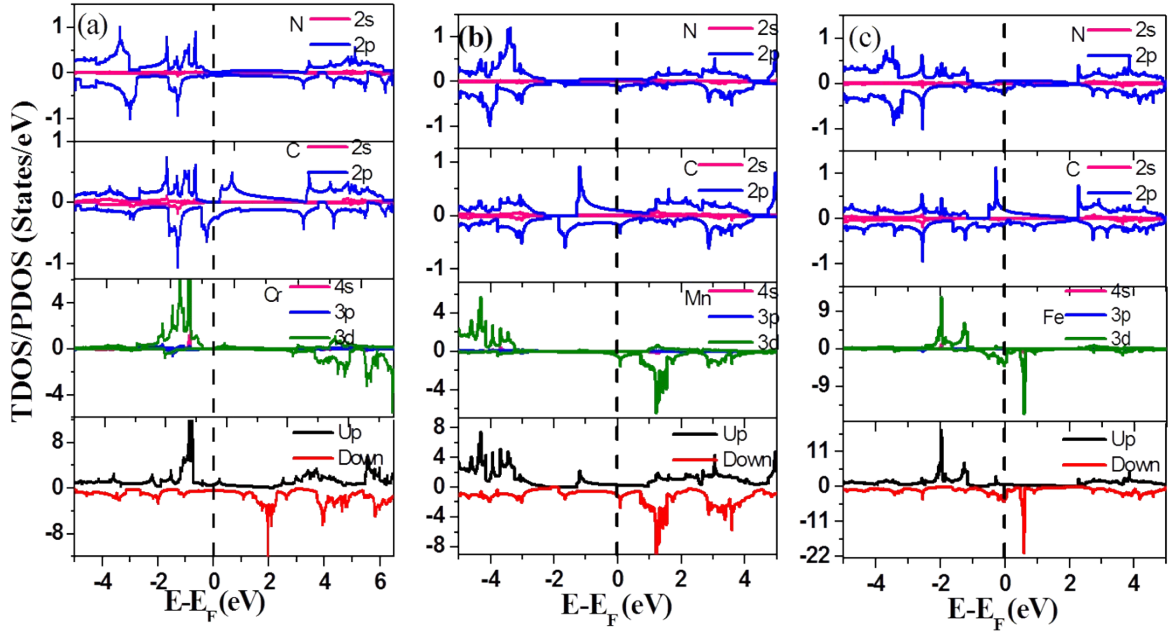

Figure S8: (a) TDOS and pDOS plot of (a) Cr@gt-C<sub>3</sub>N<sub>3</sub>, (b) Mn@gt-C<sub>3</sub>N<sub>3</sub> and (c) Fe@gt-C<sub>3</sub>N<sub>3</sub> (Fermi level is shifted to zero and indicated by a black dashed line).

Table S4: Exchange energy ( $E_{ex}$ ) and Curie temperature value of TM@gt-C<sub>3</sub>N<sub>3</sub> system.

| Compound                            | Magnetic<br>Moment/TM<br>( $\mu_B$ ) | Exchange energy<br>(meV)/TM<br>[ $E_{ex} = E_{FM} - E_{AFM}$ ] | Energy Difference<br>(meV)/TM<br>( $E_{diff} = E_{FM} - E_{NSP}$ ) | Curie<br>Temperature<br>( $T_C$ ) in (K)      | MAE in<br>(meV)/TM<br>(Magnetic<br>Anisotropy<br>Energy)     |
|-------------------------------------|--------------------------------------|----------------------------------------------------------------|--------------------------------------------------------------------|-----------------------------------------------|--------------------------------------------------------------|
| Cr@gt-C <sub>3</sub> N <sub>3</sub> | 3.69                                 | -312.99                                                        | -53.79                                                             | 338*<br>(205) <sup>4</sup> (252) <sup>5</sup> | 4.02 <sup>#</sup><br>(2.40) <sup>6</sup> (2.23) <sup>7</sup> |
| Mn@gt-C <sub>3</sub> N <sub>3</sub> | 4.75                                 | -307.74                                                        | -46.13                                                             | 328                                           | 2.44                                                         |
| Fe@gt-C <sub>3</sub> N <sub>3</sub> | 3.85                                 | -303.55                                                        | -75.21                                                             | 326                                           | 1.19                                                         |

\*Cr@gt-C<sub>3</sub>N<sub>3</sub> shows higher Curie temperature compare to first row transition metal incorporated carbon nitride systems such as V-g-C<sub>3</sub>N<sub>4</sub><sup>4</sup> and Cu-gt-C<sub>3</sub>N<sub>4</sub>.<sup>5</sup> In fact, Cr@gt-C<sub>3</sub>N<sub>3</sub> has higher MAE compared to the previously reported Fe embedded graphyne<sup>6</sup> and Co nanowires systems.<sup>7</sup> The previous studies on carbon nitride based systems did not report MAE and thus we could not compare with carbon nitride based systems.

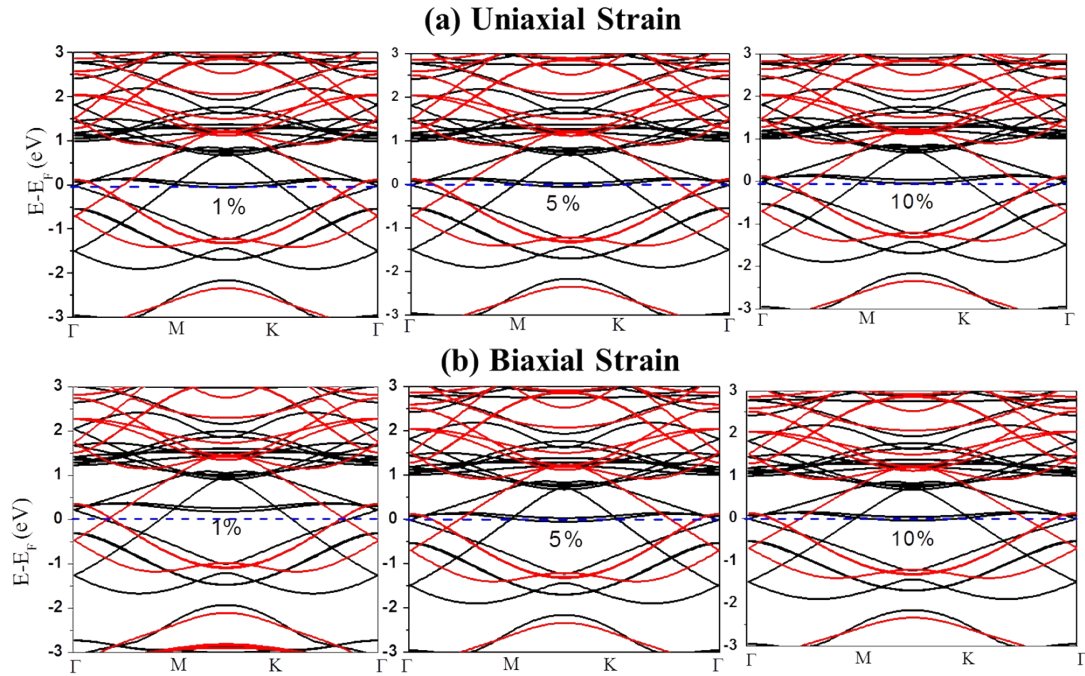

**Figure S9.** Band structures of Mn@gt-C<sub>3</sub>N<sub>3</sub> by applying 1%, 5% and 10% (a) uniaxial and (b) biaxial tensile strain. The Fermi level is set to zero and indicated by a blue dashed line.

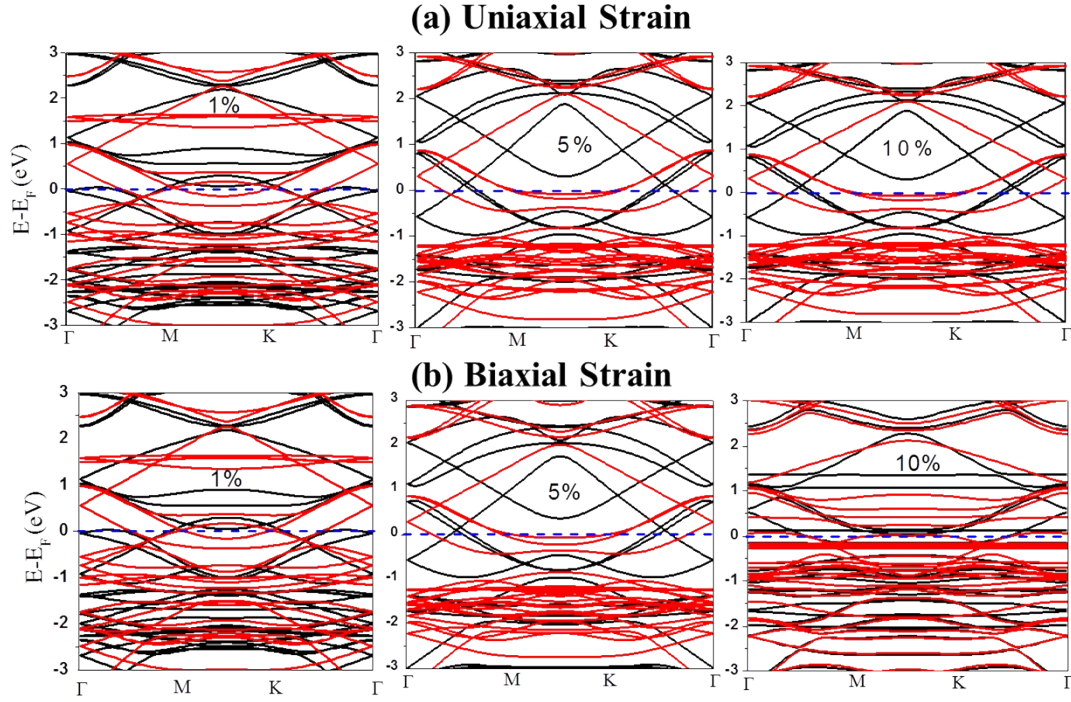

**Figure S10.** Band structures of Fe@gt-C<sub>3</sub>N<sub>3</sub> by applying 1%, 5% and 10% (a) uniaxial and (b) biaxial tensile strain. The Fermi level is set to zero and indicated by blue dashed line

### Text S2. Calculation of Magnetic Anisotropy Energy (MAE)

The magnetic anisotropy energy (MAE) is calculated by applying the torque approach.<sup>8-9</sup> Non-collinear self-consistent calculations (including spin orbit coupling) are performed in the z, y and x axis magnetization directions, respectively. MAE originates from the perpendicular and in plane contribution of spin orbit coupling (SOC), which can be expressed in terms of angular momentum operators  $L_x$ ,  $L_y$  or  $L_z$ . So the contribution of different spins (up ‘↑↑’ and down ‘↓↓’) can be expressed by the second order perturbation equation.<sup>10</sup>

$$MAE = \xi^2 \sum_{o,u} \frac{|\langle o | L_z | u \rangle|^2 - |\langle o | L_x | u \rangle|^2}{E_u - E_o}$$

Here, o and u represent the occupied and unoccupied electronic states, respectively. The  $E_o$  and  $E_u$  in the denominator are their respective band energies.  $L_z$  and  $L_x$  are the angular momentum operators along Z and X axis, and  $\xi$  denotes the strength of the SOC. So, a

potential with good MAE for practical application should hold a high value of  $\xi$ . Then, the MAE is calculated using the following equation:

$$\text{MAE} = E_{S0} - E_{S1} \quad (5)$$

Where  $E_{S0}$  is the energy of the materials without employing any magnetic axis and  $E_{S1}$  is the energy in presence of an easy axis. Total energies are converged to a precision of  $10^{-6}$  eV in MAE calculations.

### Text S3.1 Mean Field Theory (MFT):

We have taken the MFT approach to calculate the Curie temperature for the two dimensional TM@gt-C<sub>3</sub>N<sub>4</sub> systems. This method has been previously used by Li et al.<sup>11</sup> for the Curie temperature calculation for Mn-phthalocyanine (MnPc) system. The main idea behind MFT method is to replace all interactions to any one body with an average or effective interaction.<sup>8</sup> It reduces any multi-body problem into an effective one-body problem. The detailed partition function can be written as follows,

$$Z = \sum_{m=-M, -M+2, \dots, M-2, M} e^{\gamma J' m < M > / k_B T} \quad (6)$$

Here, ' $J'$ ' is the exchange parameter, ' $\gamma$ ' is the coordination number, ' $m$ ' is the ensemble-average magnetic moment, and ' $M$ ' is the calculated magnetic moment of TM.

Thus, the average spin of each magnet becomes,

$$< m > = \frac{1}{Z} \sum_{m=-M, -M+2, \dots, M-2, M} m \times e^{\gamma J' m < M > / k_B T} \quad (7)$$

Now, if we assume that,  $P = \frac{\gamma J'}{k_B T}$ , then the equation 5 becomes,

The above equation can be easily deducible when the parameter ‘P’ varies along with the static solution  $\langle m \rangle$ . At the critical point,

$$P = P_c = \frac{\gamma J'}{k_B T_c} \quad (8)$$

At this critical point, the phase transition of the system between ferromagnetic to paramagnetic occurs. This critical point is known as Curie temperature.

### 3.2 Monte Carlo Simulations:

Monte Carlo simulations involve generating a subset of configurations or samples, chosen using a random algorithm from a configuration space, according to a probability distribution or weight function. Observables are then computed as averages over the samples.<sup>12</sup>

One sample or configuration of the magnet is a particular assignment of spin values, say

$$s_1 = +1; s_2 = -1; s_3 = +1; \dots \dots \dots ; s_{N_s} = +1 \quad (9)$$

in which each spin is set “up” or “down”. According to statistical mechanics, the average value of an observable is got by weighting each configuration with the Boltzmann factor. For example, the average magnetization at some fixed temperature T is given by,

$$\langle M \rangle = \frac{\sum_{Config} M e^{-E/k_B T}}{\sum_{Config} e^{-E/k_B T}} \quad (10)$$

At the Curie temperature ( $T_c$ ) we expect a marked fluctuation in the magnetic moment (M).

### Reference:

- [1] R. G. Ross and W. Hume-Rothery, *J. Less-Common Metals*, 1963, **5**, 259.



- [2] C. P. Gazzara, R. M. Middleton, R. J. Weiss, and E. O. Hall, *Acta Crystallogr.* 1967, **22**, 859.
- [3] R. Kohlhaas, P. Donner, and N. Schmitz-Pranghe, *Z. Angew. Phys.*, **1967**, 23, 245.
- [4] Ghosh D.; Periyasamy G.; Pandeyc B.; Pati S. K. *J. Mater. Chem. C* **2014**, 2, 7943–7951.
- [5] Meng B.; Xiao W-z.; Wang L-l.; Yue, L.; Zhang S.; Zhang H-y.; *Phys. Chem. Chem. Phys.*, **2015**, 17, 22136-22143.
- [6] J. He, P. Zhou, N. Jiao, S. Y. Ma, K. W. Zhang, R. Z. Wang, and L. Z. Sun. *Sci. Rep* 2013, **4**, 04014.
- [7] Hong J.; Wu R. Q.; *Phys. Rev. Lett.*, 2006, **96**, 147201.
- [8] Wang X.; Wu R.; Wang D. S.; Freeman A. J. *Phys. Rev. B: Condens. Matter Mater. Phys.*, 1996, **54**, 61.
- [9] Hu J.; Wu R. *Phys. Rev. Lett.*, 2013, **110**, 097202.
- [10] Wang D. S.; Wu R. Q.; Freeman A. J. *Phys. Rev. B: Condens. Matter Mater. Phys.*, 1993, **47**, 14932.
- [11] X. Li, X. Wu, J. Yang. *J. Am. Chem. Soc.* 2014, **136**, 5664.
- [12] D. P. Kroese, T. Brereton, T. Taimre, Z. I. Botev, *Comput. Stat.* 2014, **6**, 386.
